# Supplementary material for: A non-fullerene electron acceptor based on central carbazole and terminal diketopyrrolopyrrole functionalities for efficient, reproducible and solution-processable bulk-heterojunction devices
Source: Royal Society of Chemistry journal article supplement (doi:10.1039/c6ra01558a), 2016-01-01
Supplement: c6ra01558a1.pdf [file c6ra01558a1.pdf]

## Supporting Information

### **A non-fullerene electron acceptor based on central carbazole and terminal diketopyrrolopyrrole functionalities for efficient, reproducible and solution-processable bulk-heterojunction devices**

Aaron M. Raynor,<sup>a</sup> Akhil Gupta,<sup>\*a,b</sup> Hemlata Patil,<sup>a</sup> Di Ma,<sup>c</sup> Ante Bilic,<sup>d</sup> Trevor Rook<sup>a</sup> and Sheshanath V. Bhosale<sup>\*a</sup>

a School of Applied Sciences, RMIT University, GPO Box 2476, Melbourne Victoria 3001 Australia; Tel: +61 3 9925 2680; E-mail address: [sheshanath.bhosale@rmit.edu.au](mailto:sheshanath.bhosale@rmit.edu.au)

b Institute for Frontier Materials, Deakin University, Waurn Ponds Victoria 3216 Australia; Tel: +61 3 9903 9599; E-mail: [akhilgk15@gmail.com](mailto:akhilgk15@gmail.com)

c College of Material Science and Engineering, Beijing University of Chemical Technology Beijing 100029 China

d Virtual Nanoscience Lab, CSIRO Manufacturing, Parkville Victoria 3052 Australia

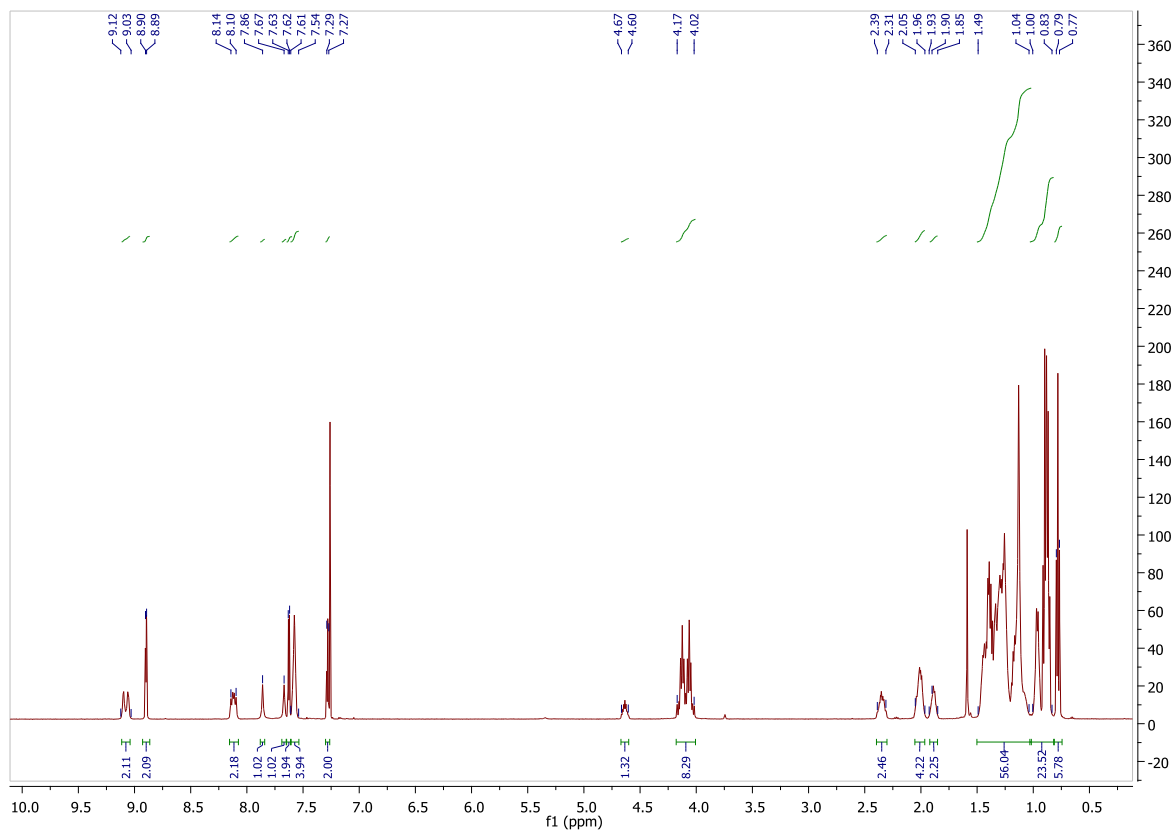

**Fig. S1**  $^1\text{H}$  NMR spectrum of **N7**.

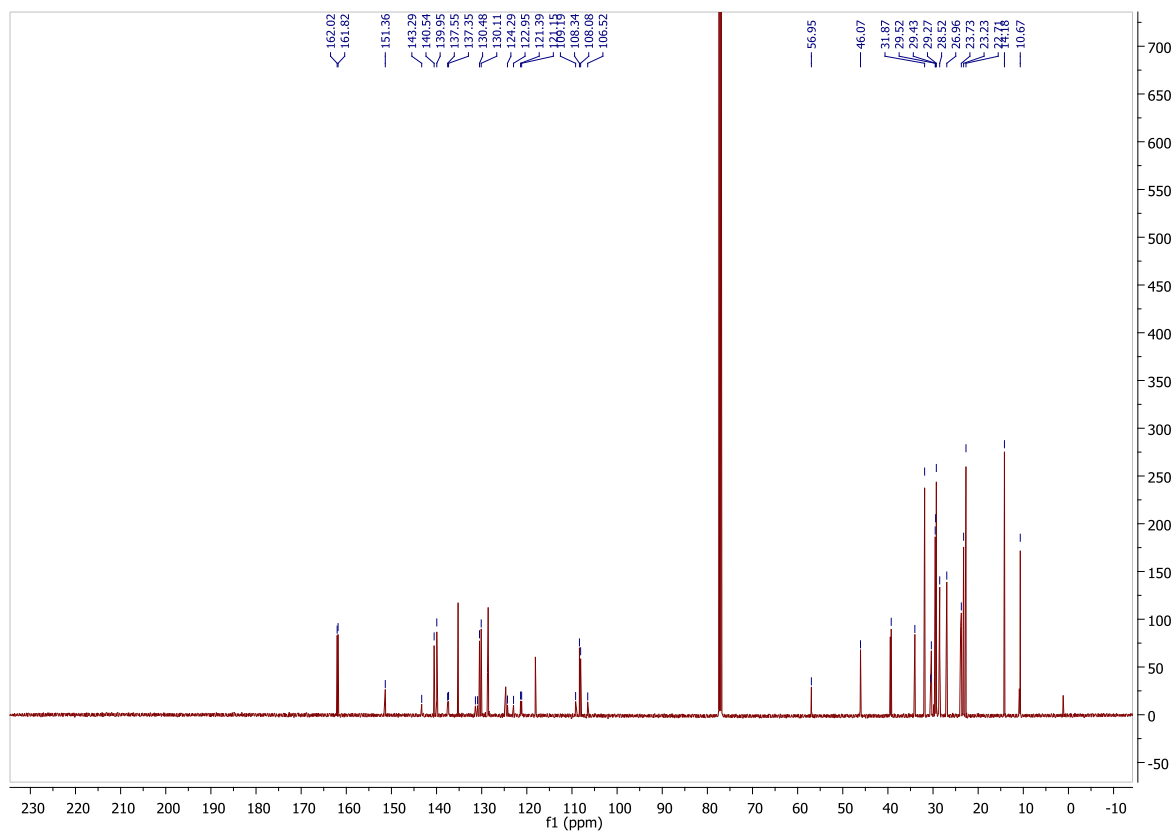

**Fig. S2**  $^{13}\text{C}$  NMR spectrum of **N7**.

| The           | optical | absorption | transition | for       | N7:      |                                   |
|---------------|---------|------------|------------|-----------|----------|-----------------------------------|
| Excited State | 1:      | Singlet-A  | 1.9797 eV  | 626.29 nm | f=1.8137 | $\langle S^{**2} \rangle = 0.000$ |
| Excited State | 2:      | Singlet-A  | 2.1368 eV  | 580.24 nm | f=0.0031 | $\langle S^{**2} \rangle = 0.000$ |
| Excited State | 3:      | Singlet-A  | 2.2472 eV  | 551.73 nm | f=0.0899 | $\langle S^{**2} \rangle = 0.000$ |
| Excited State | 4:      | Singlet-A  | 2.3141 eV  | 535.78 nm | f=0.4270 | $\langle S^{**2} \rangle = 0.000$ |
| Excited State | 5:      | Singlet-A  | 2.7292 eV  | 454.29 nm | f=0.0113 | $\langle S^{**2} \rangle = 0.000$ |
| Excited State | 6:      | Singlet-A  | 2.7908 eV  | 444.26 nm | f=0.2139 | $\langle S^{**2} \rangle = 0.000$ |
| Excited State | 7:      | Singlet-A  | 2.9066 eV  | 426.56 nm | f=0.0004 | $\langle S^{**2} \rangle = 0.000$ |
| Excited State | 8:      | Singlet-A  | 2.9540 eV  | 419.72 nm | f=0.0547 | $\langle S^{**2} \rangle = 0.000$ |
| Excited State | 9:      | Singlet-A  | 2.9969 eV  | 413.71 nm | f=0.2561 | $\langle S^{**2} \rangle = 0.000$ |
| Excited State | 10:     | Singlet-A  | 3.1167 eV  | 397.81 nm | f=0.0102 | $\langle S^{**2} \rangle = 0.000$ |

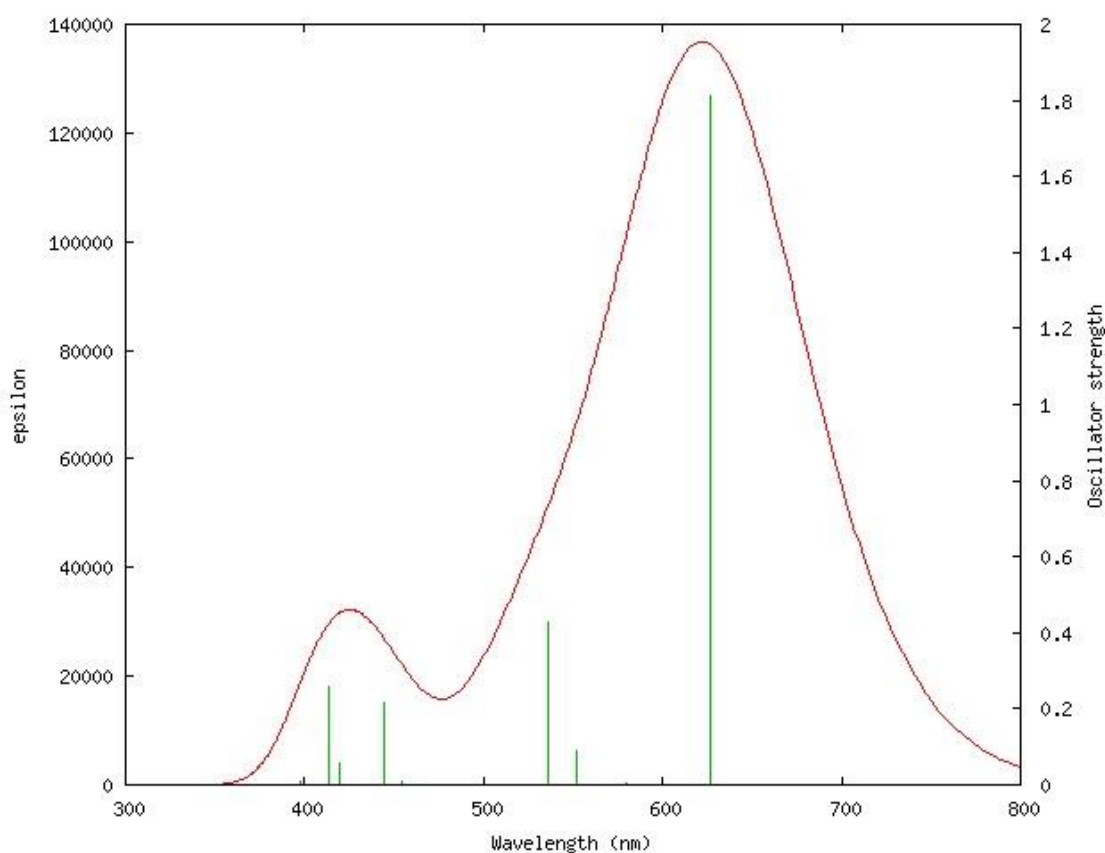

**Fig. S3** Theoretical optical absorption transitions and spectrum of **N7**

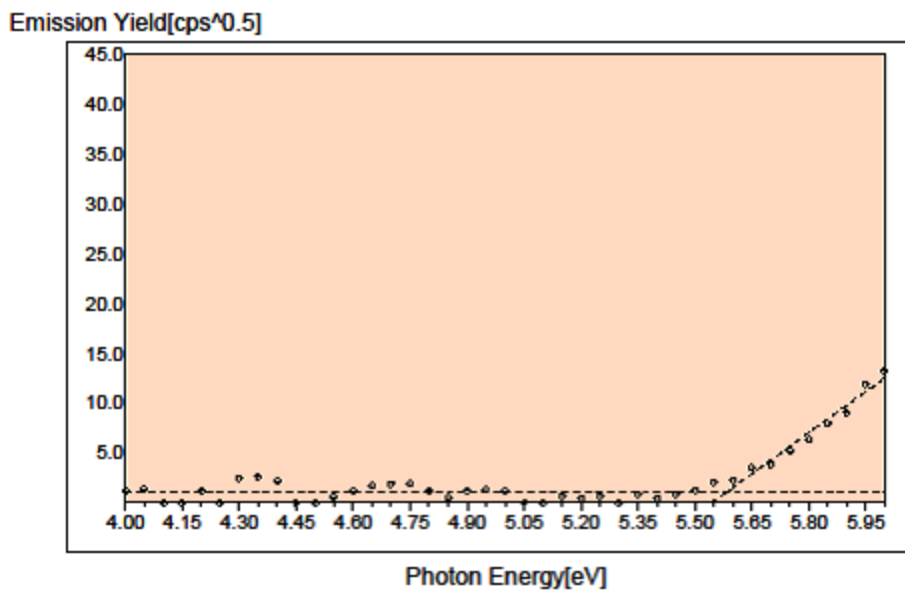

**Fig. S4** PESA spectrum of thin film of **N7**. The dashed-lines show the fits to extract ionisation potential (-5.56 eV) which corresponds to the HOMO energy level.

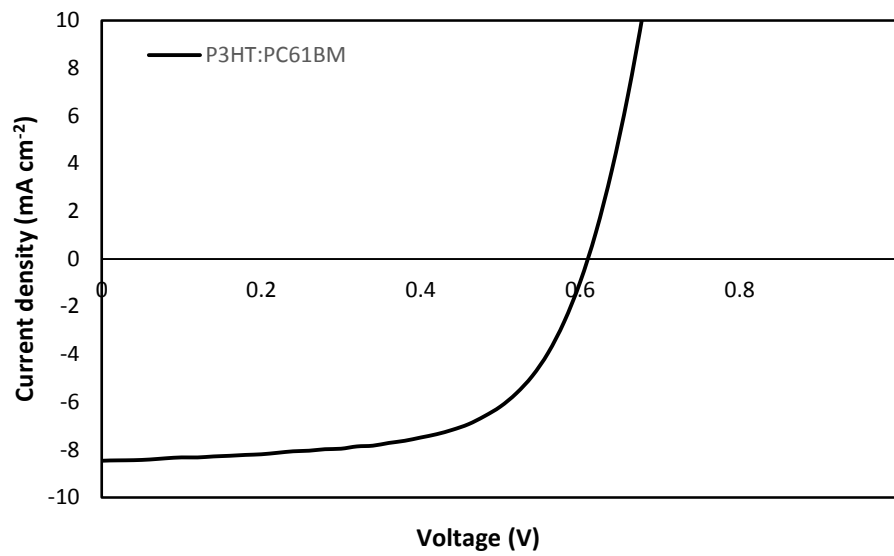

**Fig. S5** P3HT:PC<sub>61</sub>BM device under similar conditions reported for P3HT:N7.
